# Supplementary material for: The circadian E3 ligase complex SCFFBXL3+CRY targets TLK2
Source: PubMed Central journal article supplement (PMC6336870; doi:10.1038/s41598-018-36618-3), 2019-01-17
Supplement: 41598_2018_36618_MOESM1_ESM.pdf [file 41598_2018_36618_MOESM1_ESM.pdf]

## Supplementary Material Related to

**Title: The circadian E3 ligase complex SCF<sup>FBXL3+CRY</sup> targets TLK2**

Authors: Stephanie Papp Correia<sup>1</sup>, Alanna B. Chan<sup>1</sup>, Megan Vaughan, Norjin Zolboot, Valerie Perea, Anne-Laure Huber, Anna Kriebs, James J. Moresco, John R. Yates III, and Katja A. Lamia\*

Department of Molecular Medicine, The Scripps Research Institute, 10550 North Torrey Pines Road, La Jolla, CA 92037, USA

<sup>1</sup> These authors contributed equally to this work.

\*Correspondence: [klamia@scripps.edu](mailto:klamia@scripps.edu)

|                |   |   |   |   |   |   |   |   |   |   |   |   |   |   |
|----------------|---|---|---|---|---|---|---|---|---|---|---|---|---|---|
| FLAG-FBXL3 WT: | - | + | - | - | - | - | + | - | - | - | + | - | - | - |
| FLAG-FBXL3ΔF:  | - | - | + | + | + | - | - | + | + | + | - | - | + | + |
| HA-CRY1:       | - | - | - | + | - | - | - | - | + | - | - | - | + | - |
| HA-CRY2:       | - | - | - | - | + | - | - | - | - | + | - | - | - | + |

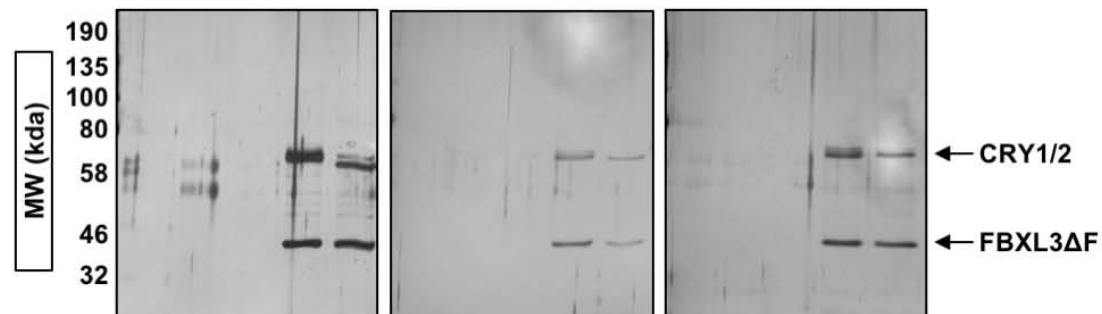

**Supplementary Figure 1: APMS experiments performed in triplicate for screen. Related to Figure 1.** Proteins detected by silver stain in samples prepared as shown in (Figure 1A) from 293T cells and separated by SDS-PAGE.

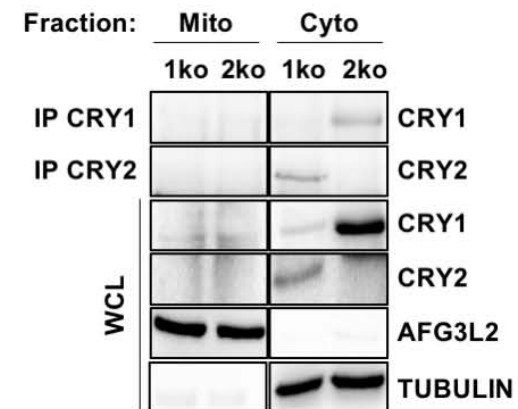

**Supplementary Figure 2: No detectable CRY1 or CRY2 in liver mitochondria.** Proteins detected by IB in protein samples or after CRY1 or CRY2 IP from mitochondrial (Mito) or cytoplasmic (Cyto) fractions prepared from *Cry1<sup>-/-</sup>* (1ko) or *Cry2<sup>-/-</sup>* (2ko) mice at zeitgeber time (ZT, hours after lights on) 16.

|                 |   |   |   |   |   |   |   |   |   |   |   |   |   |
|-----------------|---|---|---|---|---|---|---|---|---|---|---|---|---|
| FLAG-hTLK1 iso1 | - | - | + | + | + | + | - | - | - | - | - | - | - |
| FLAG-hTLK1 iso3 | - | - | - | - | - | - | + | + | + | + | - | - | - |
| FLAG-hTLK2 isoB | - | - | - | - | - | - | - | - | - | - | + | + | + |
| HA-mFBXL3       | + | + | - | - | + | + | - | - | + | + | - | - | + |
| HA-mCRY         | 1 | 2 | 1 | 2 | 1 | 2 | 1 | 2 | 1 | 2 | 1 | 2 | 1 |

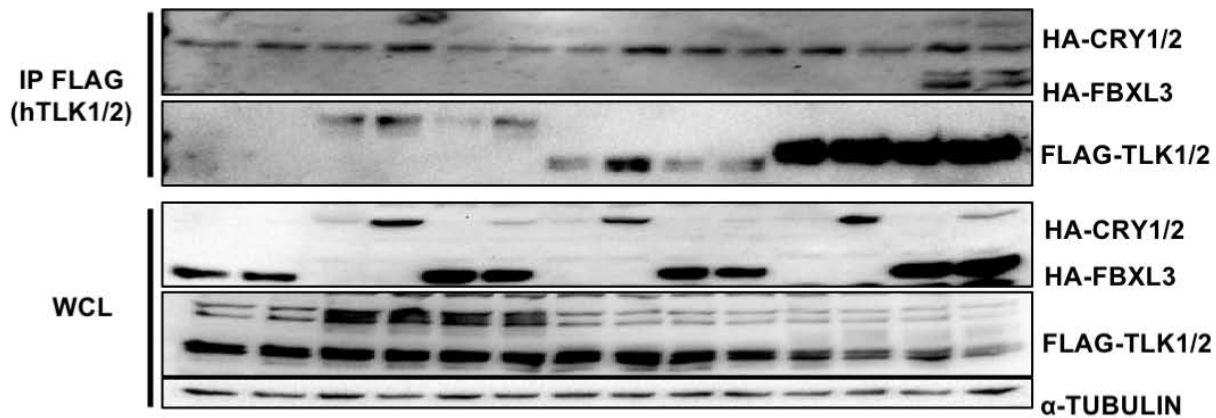

**Supplementary Figure 3: TLK2 interacts with FBXL3 and CRY.** Detection of indicated proteins by IB in WCL or following FLAG IP from 293T cells expressing the indicated plasmids

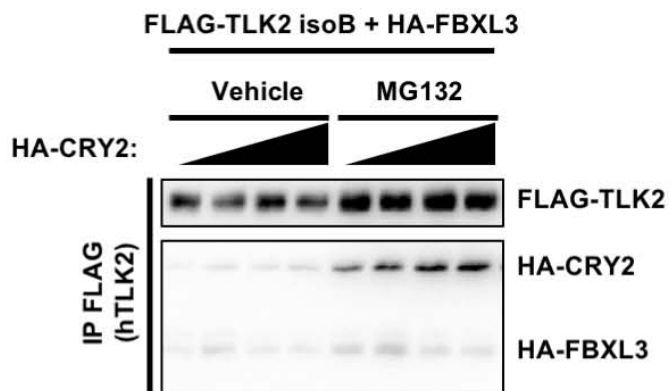

**Supplementary Figure 4: FBXL3+CRY2 stimulate proteasomal degradation of TLK2**  
 Proteins detected by IB after FLAG IP from 293T cells expressing the indicated plasmids.

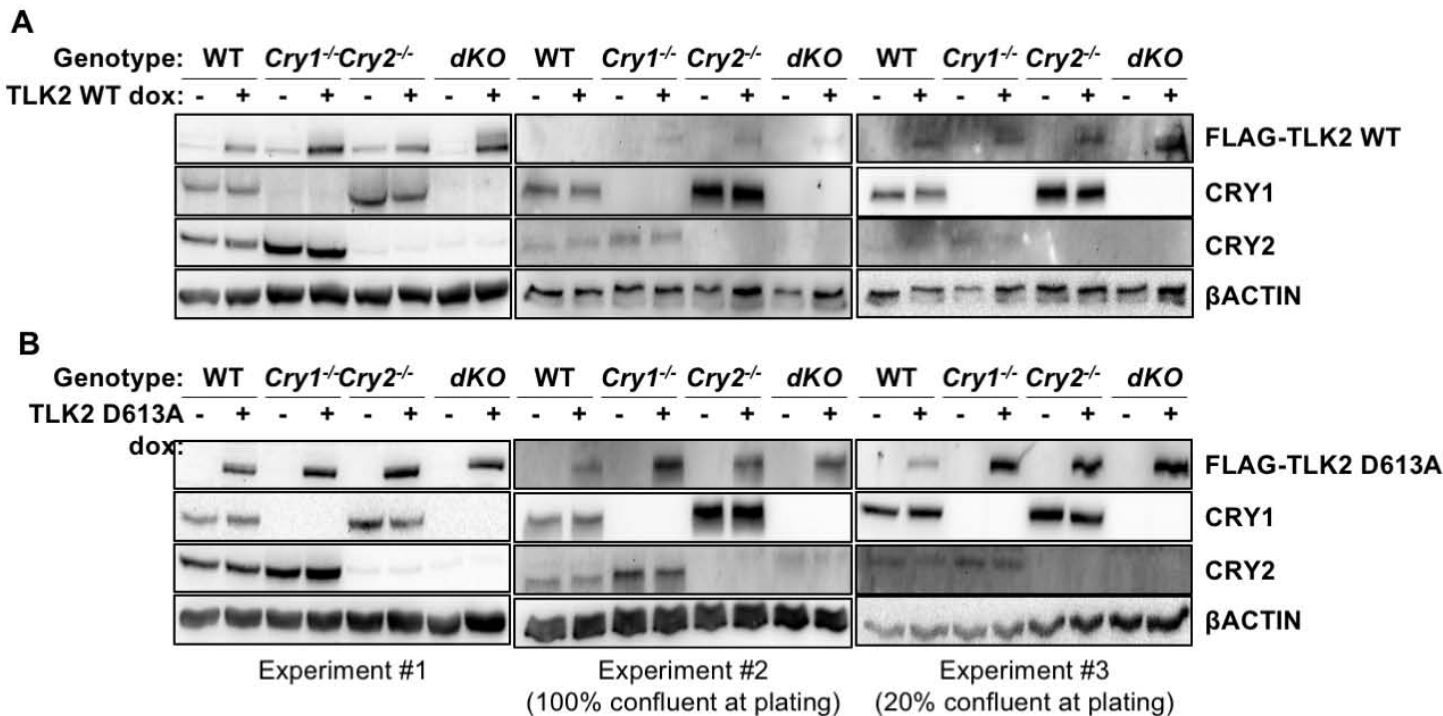

**Supplementary Figure 5: Deletion of CRY1 or CRY2 increases TLK2 protein.** Proteins detected by IB in WCL from mouse skin fibroblasts of the indicated genotypes stably expressing doxycycline-inducible wildtype (A) or catalytically inactive (B) FLAG-TLK2 following treatment with vehicle (DMSO) or doxycycline for 48 hours.

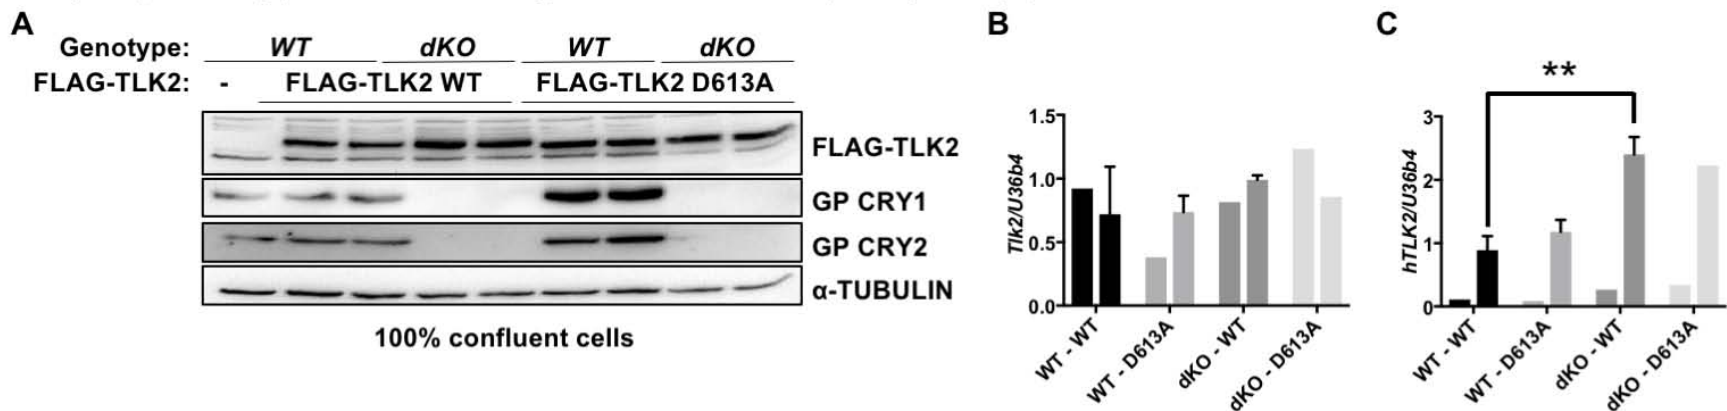

**Supplementary Figure 6: Deletion of CRY1 or CRY2 increases TLK2 protein.** (A) Proteins detected by IB in WCL from mouse skin fibroblasts of the indicated genotypes stably expressing doxycycline-inducible wildtype (WT) or catalytically inactive (D613A) FLAG-TLK2 following treatment with vehicle (DMSO) or doxycycline for 48 hours. (B,C) mRNA expression of endogenous mouse *Tik2* (B) or exogenous human *TLK2* (C) normalized to mouse *U36b4* measured by quantitative real-time PCR in RNA prepared from cells plated in parallel to those examined in (A).

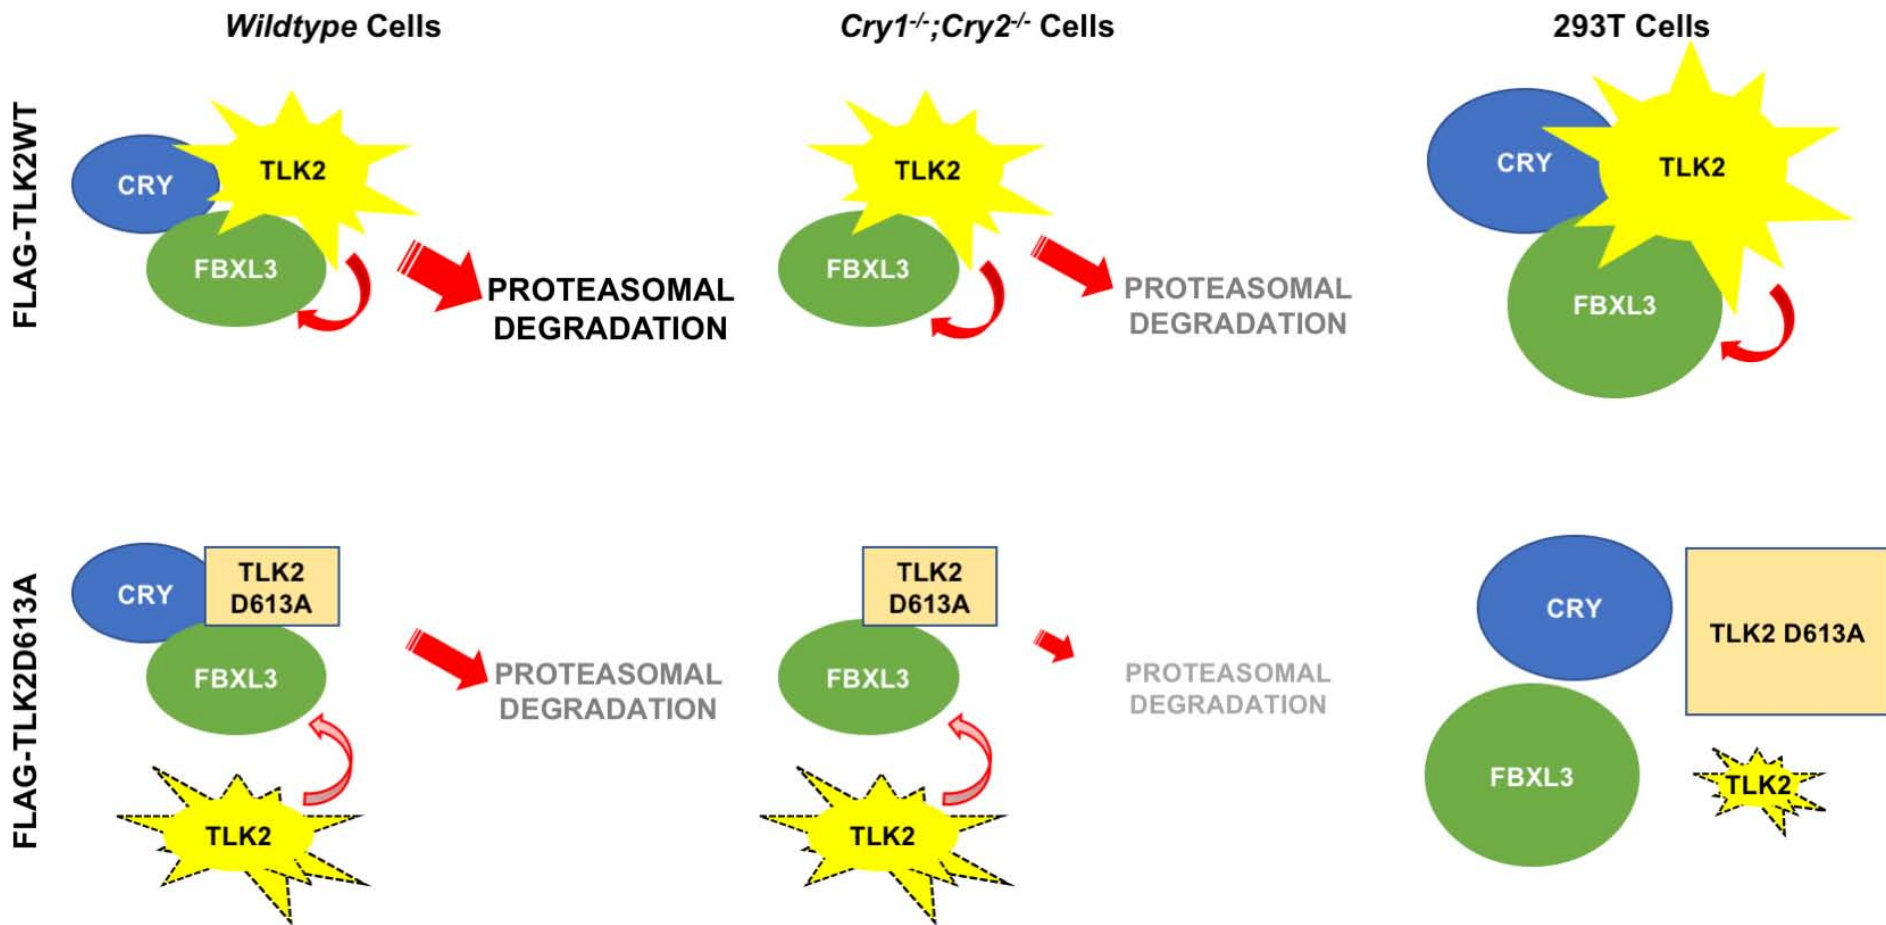

**Supplementary Figure 7: Hypothetical model for FBXL3-CRY regulation of TLK2.** Our data indicate that SCF<sup>FBXL3+CRY1/2</sup> contributes to TLK2 destabilization by promoting its ubiquitination. We propose that TLK2 enhances its own ubiquitylation and degradation by phosphorylating a component of the SCF<sup>FBXL3+CRY</sup> complex. In CRY-deficient cells, wildtype TLK2 may interact with FBXL3 to a lesser extent than when CRY1/2 are also present. (As seen in figure 2, TLK2 can interact with FBXL3 in the absence of CRY overexpression). In wildtype cells, we hypothesize that phosphorylation of the endogenous SCF<sup>FBXL3+CRY1/2</sup> complex by endogenous TLK2 enables its interaction with exogenous FLAG-TLK2D613A. This interaction would be weaker in CRY-deficient cells. The stronger impact of the D613A mutation on interaction with FBXL3 and CRY in 293T cells may reflect the fact that all three proteins are overexpressed, resulting in a much greater ratio of CRY and FBXL3 to endogenous TLK2 than in the experiments performed in primary fibroblasts.

**FLAG IPs:**

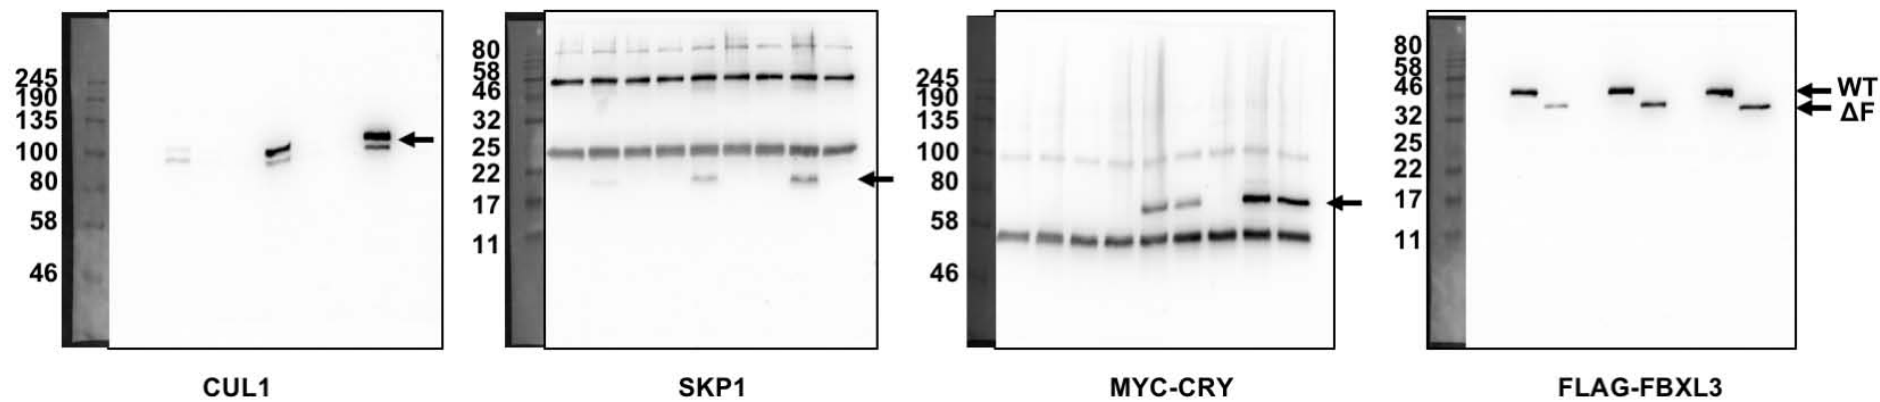

**Lysates:**

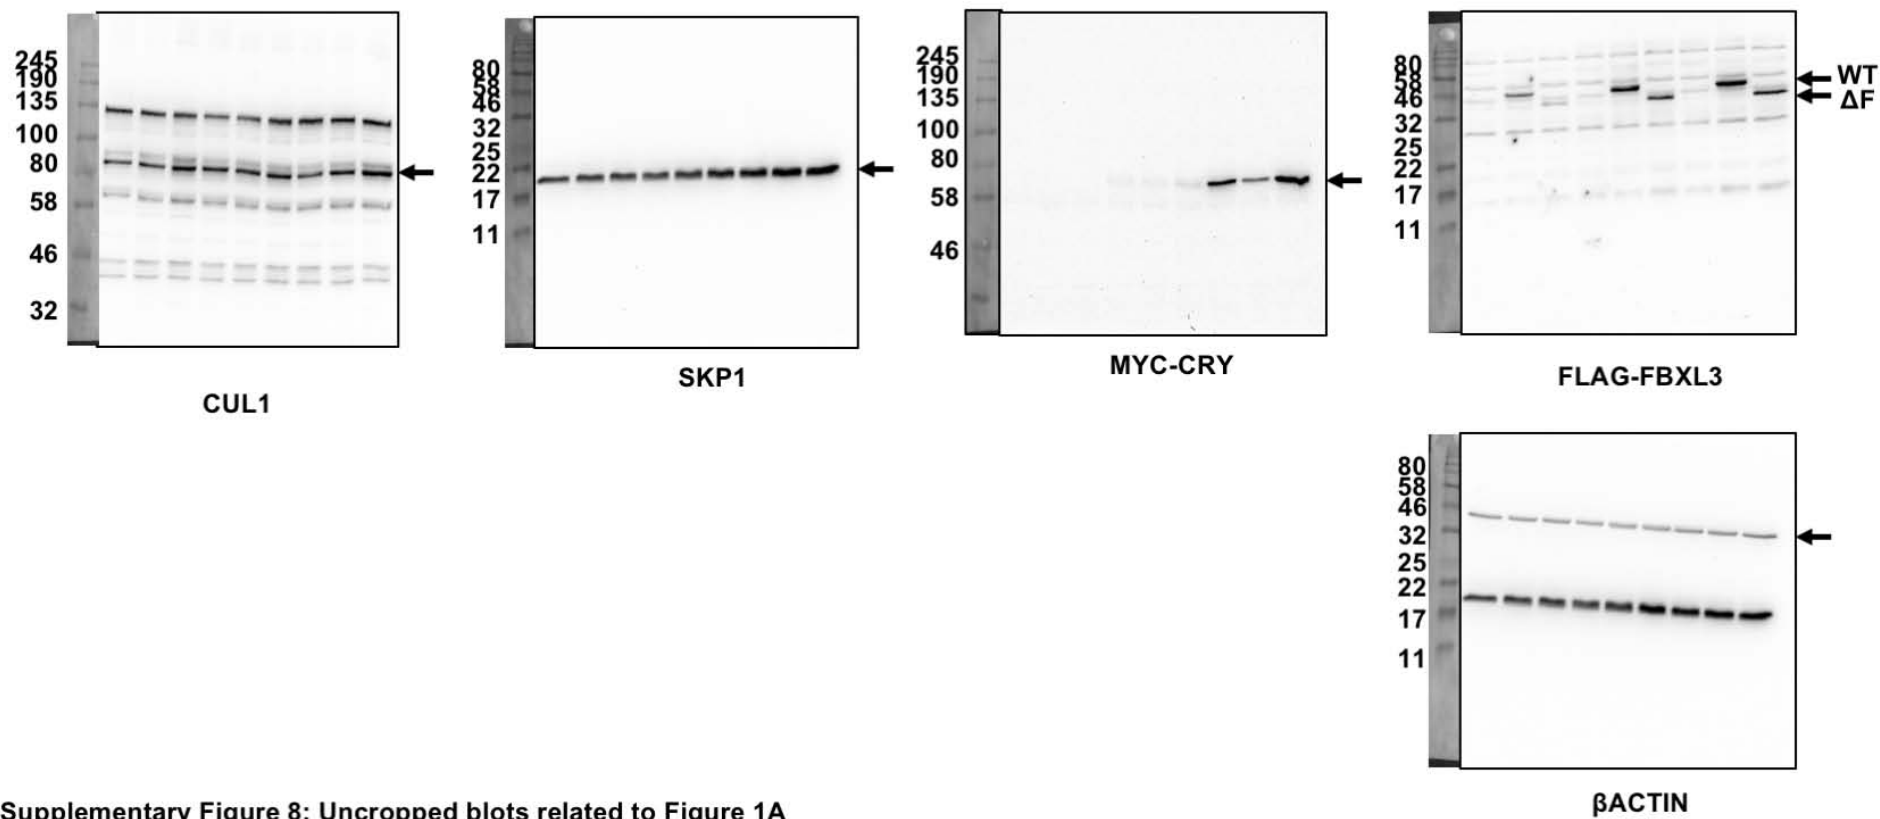

Supplementary Figure 8: Uncropped blots related to Figure 1A

**FLAG IPs:**

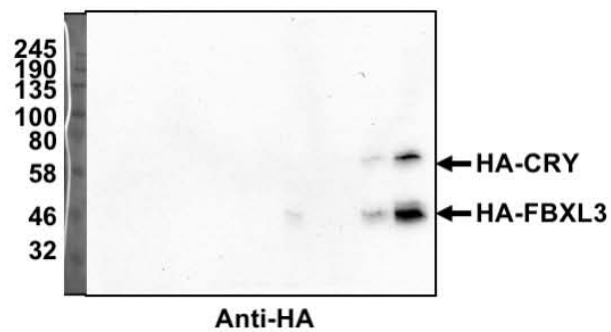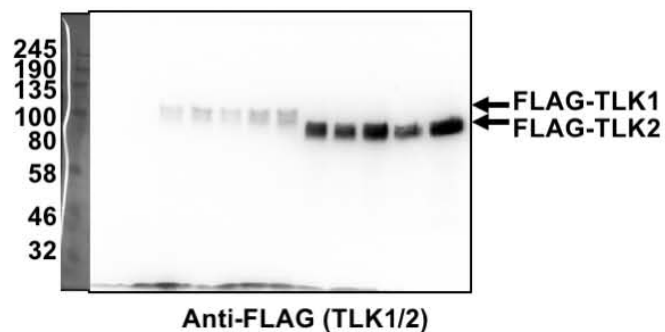

**Lysates:**

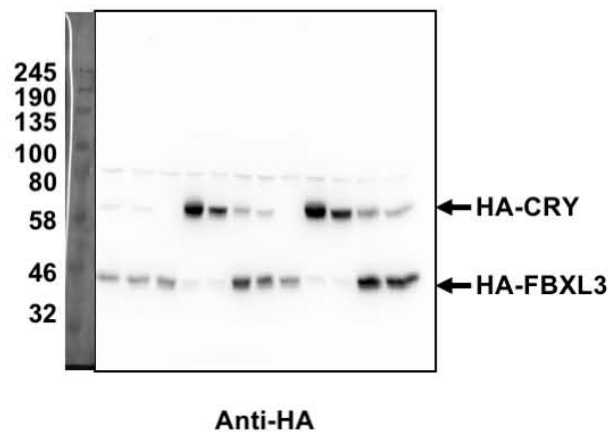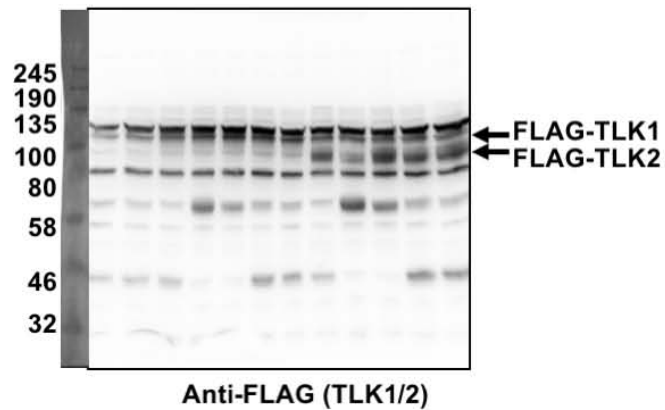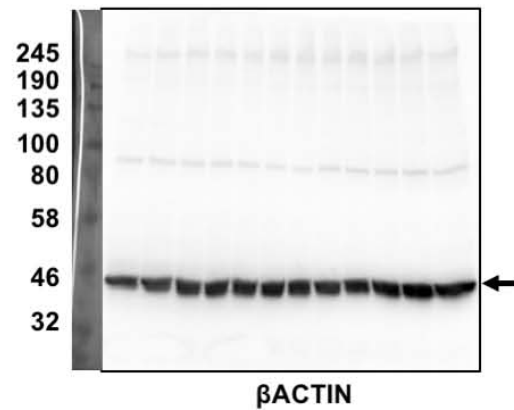

**FLAG IPs:**

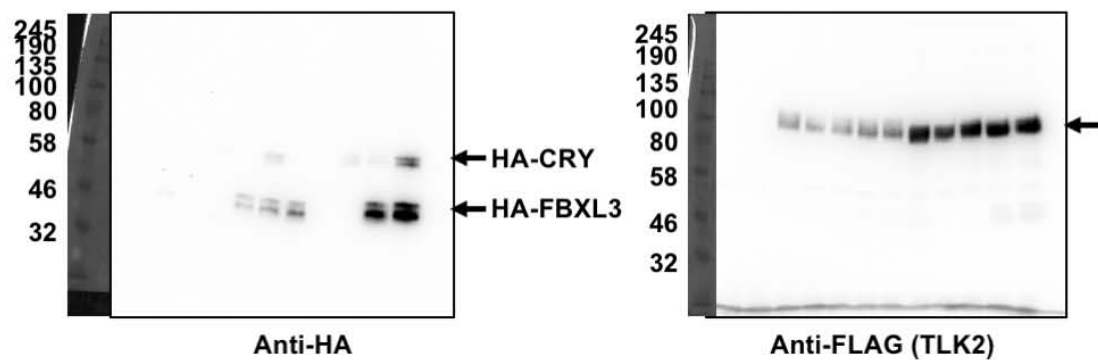

**Lysates:**

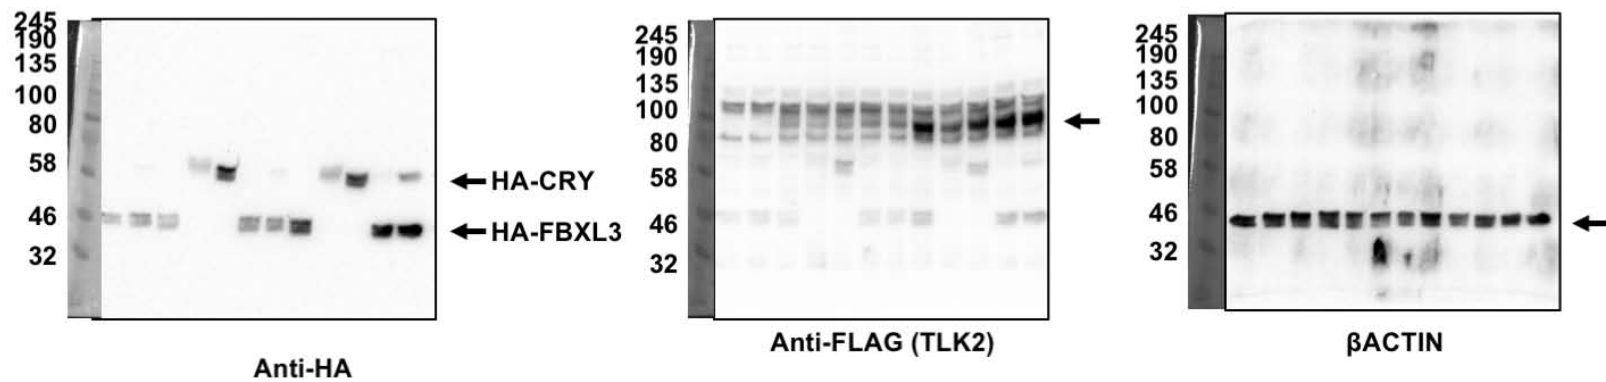



**FLAG IPs:**

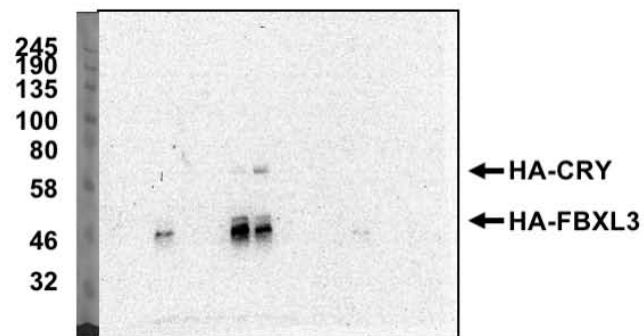

Anti-HA

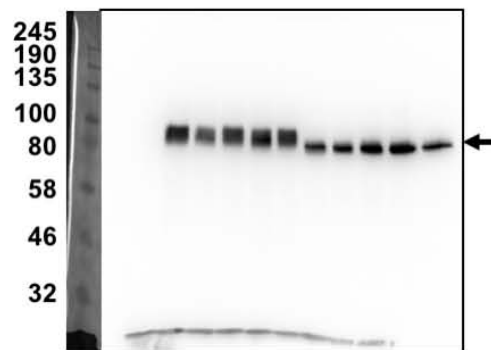

Anti-FLAG (TLK2)

**Lysates:**

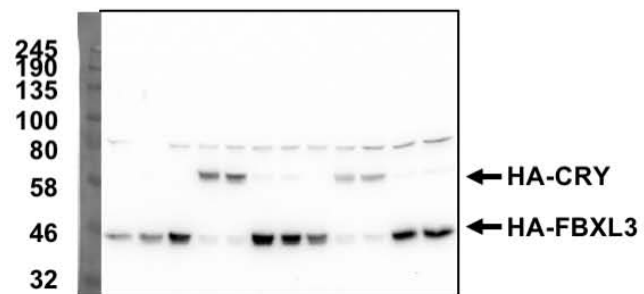

Anti-HA

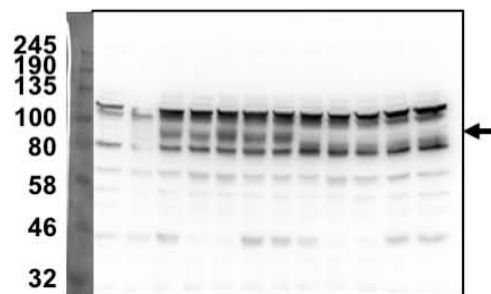

Anti-FLAG (TLK2)

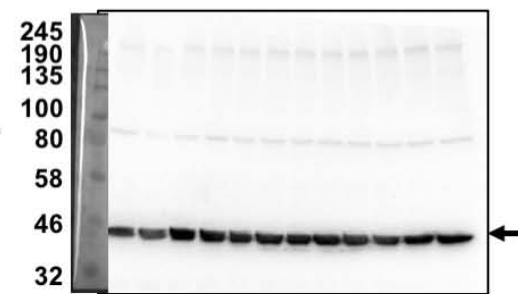

$\beta$ ACTIN

**Figure 3A (experiment 1):**

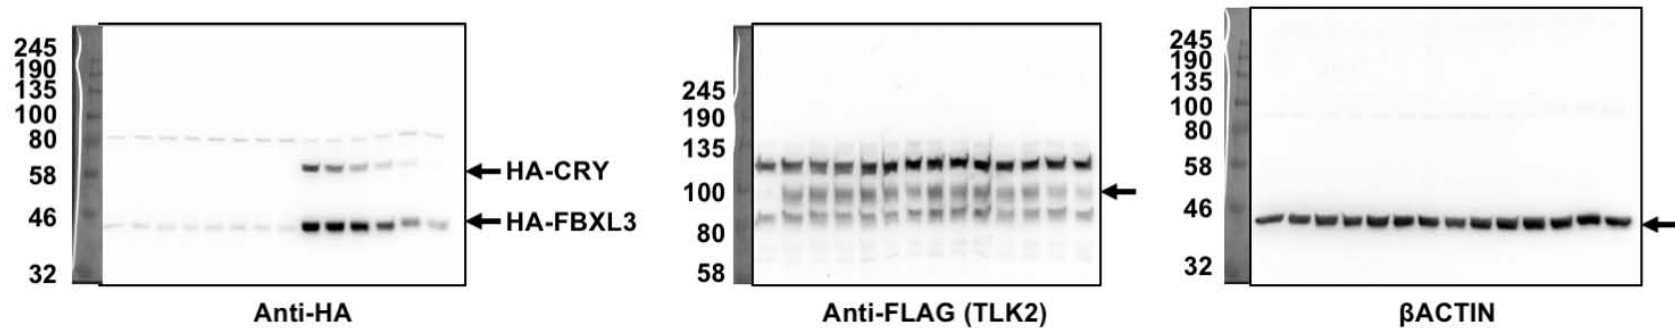

**Figure 3B (experiment 2):**

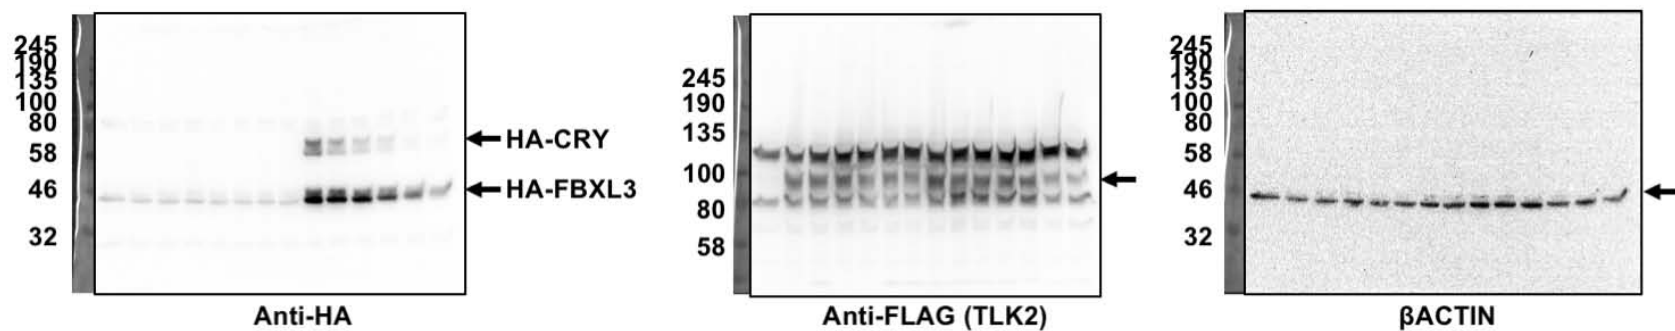

**Figure 3B (experiment 3):**

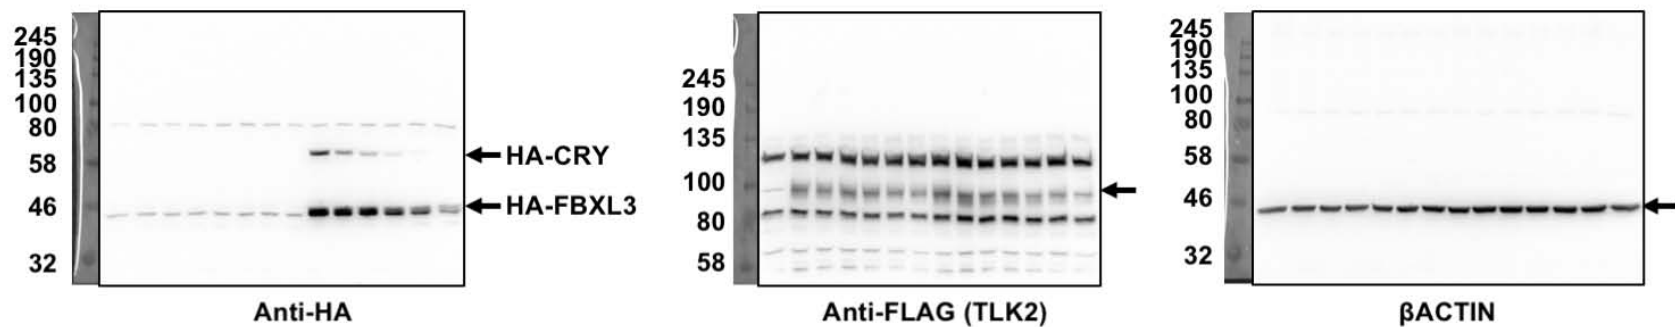

**Left Panels (CRY1):**

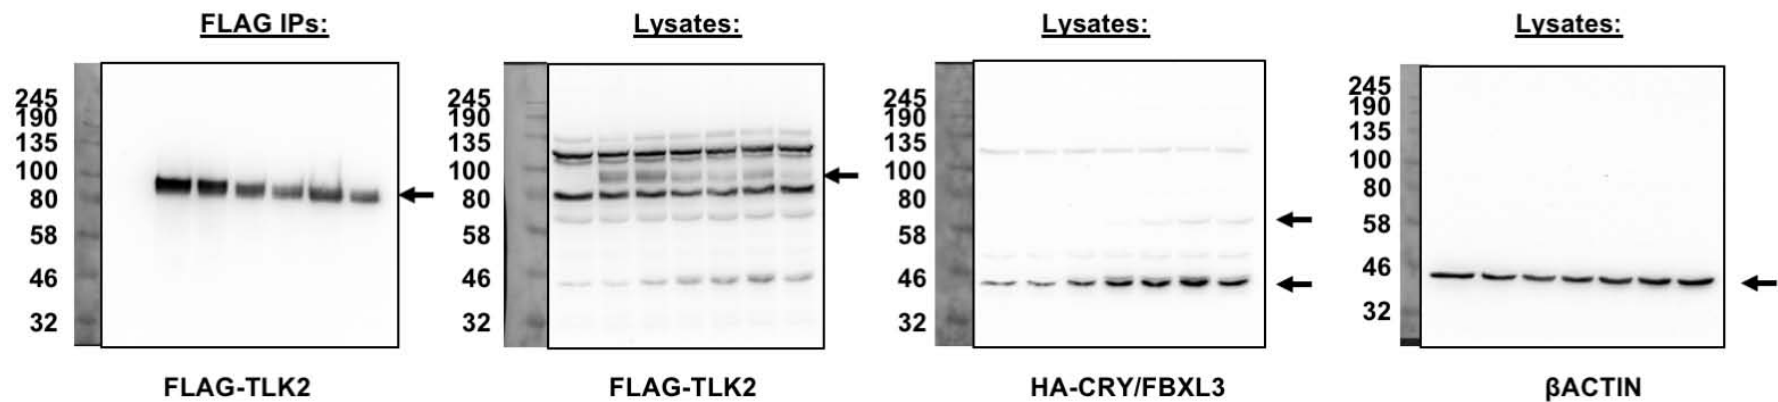

**Right Panels (CRY2):**

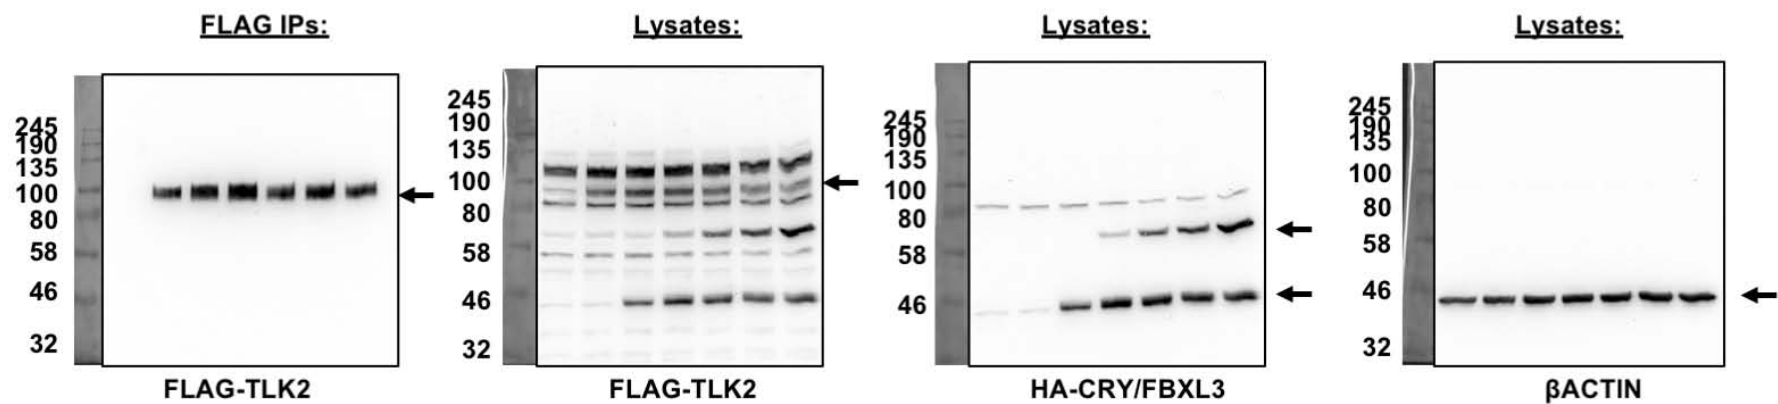

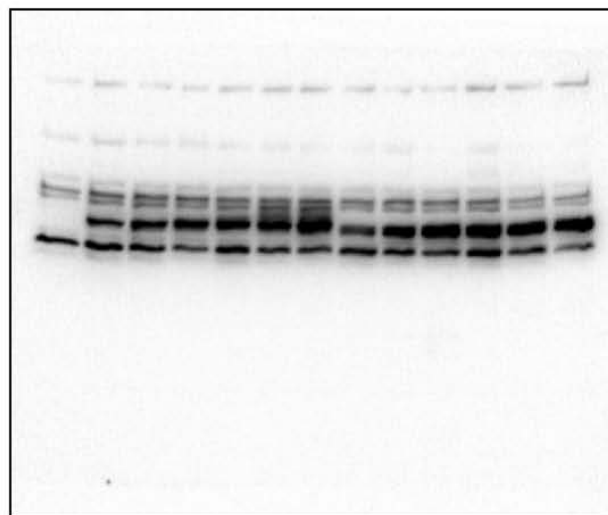

FLAG-TLK2

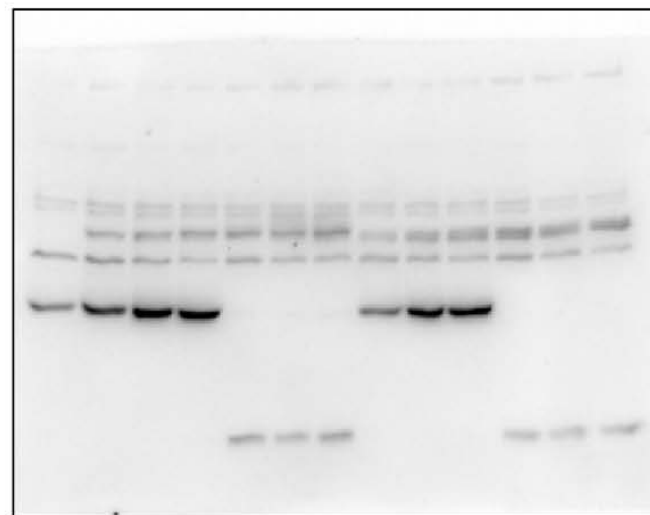

CRY1

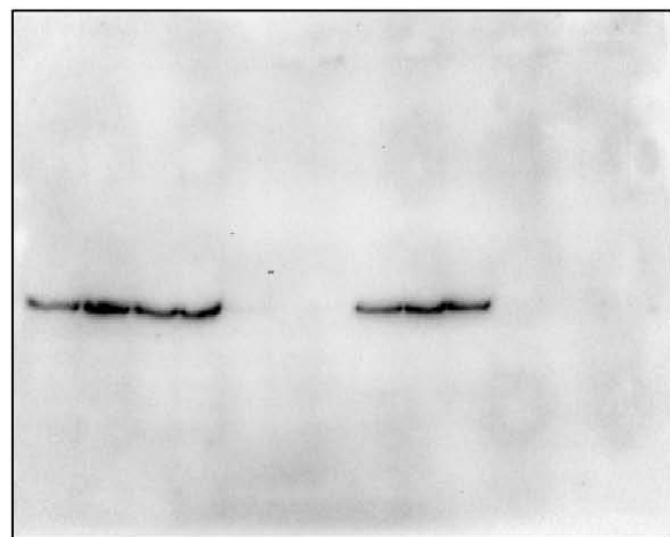

CRY2

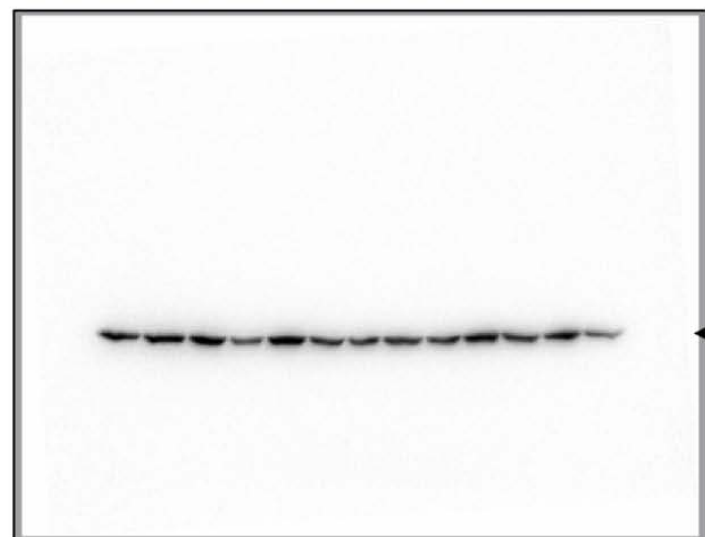

TUBULIN

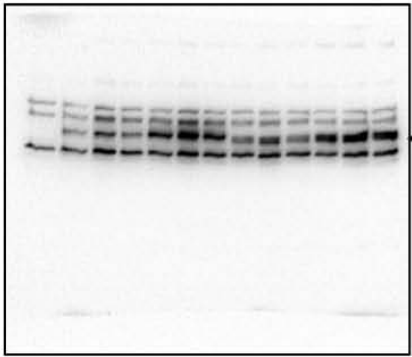

100% FLAG-TLK2

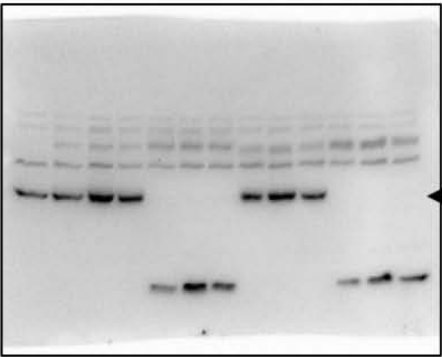

100% CRY1

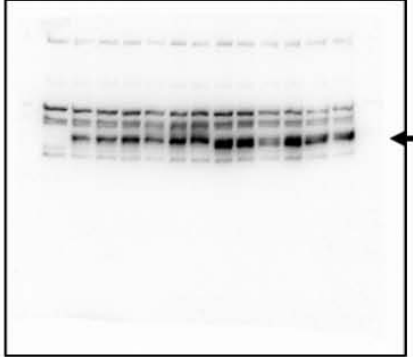

10% FLAG-TLK2

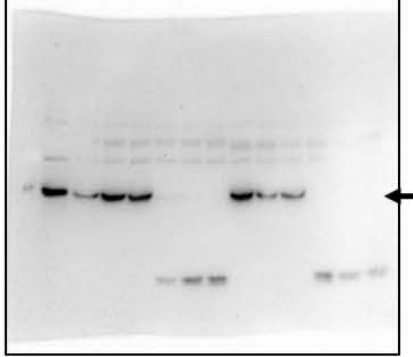

10% CRY1

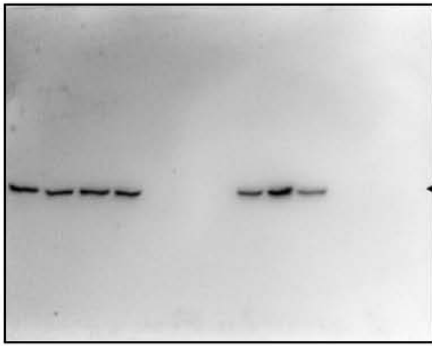

100% CRY2

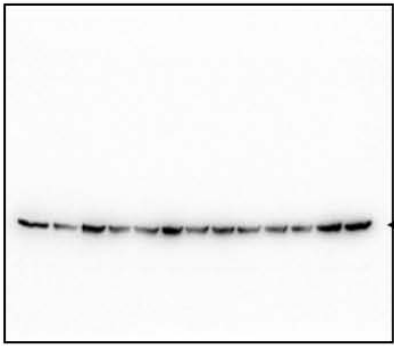

100% TUBULIN

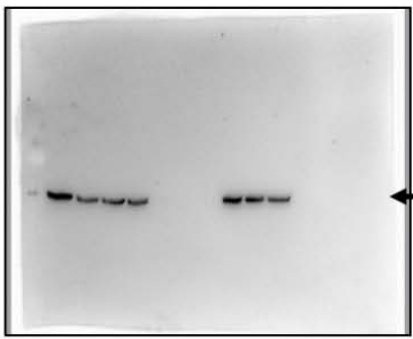

10% CRY2

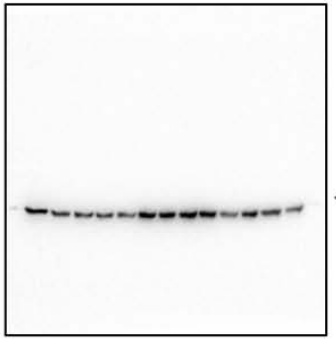

10% TUBULIN

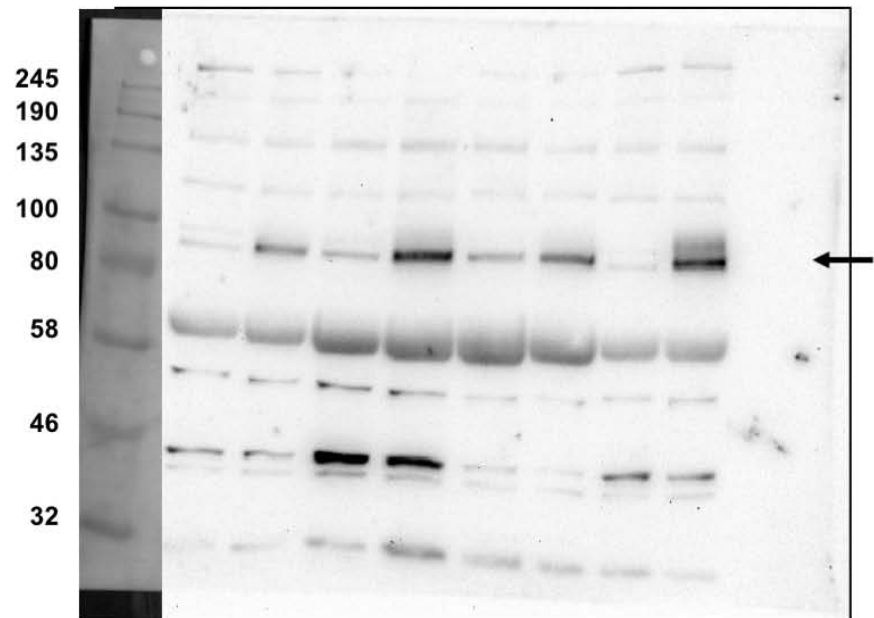

Experiment #1 FLAG-TLK2

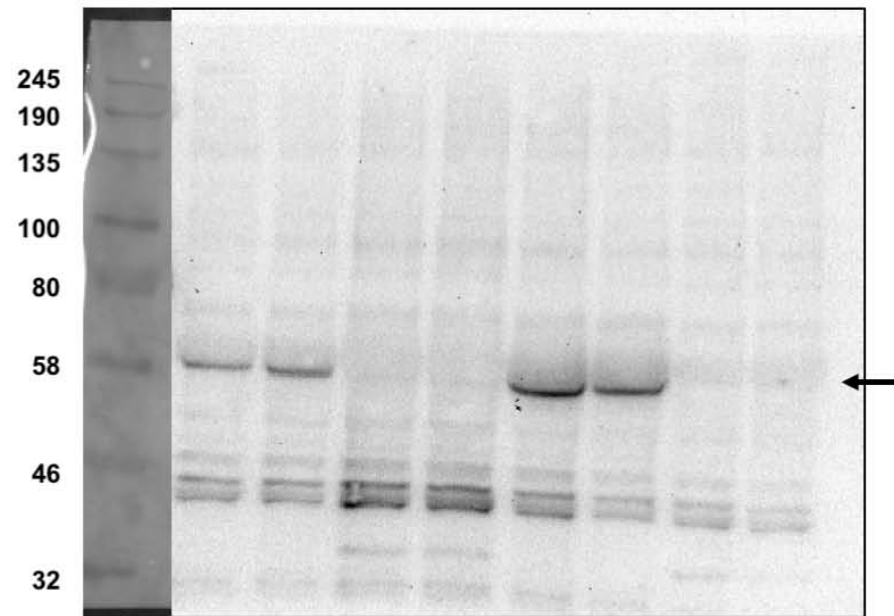

Experiment #1 CRY1

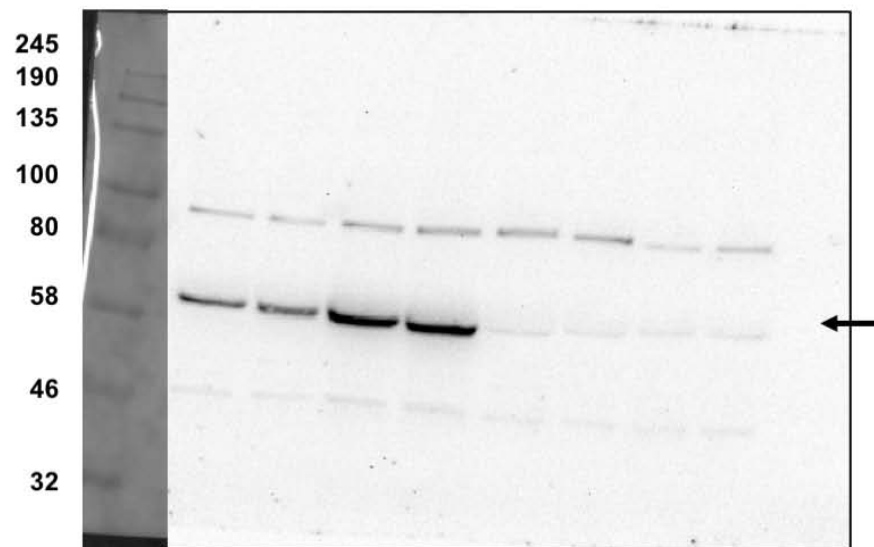

Experiment #1 CRY2

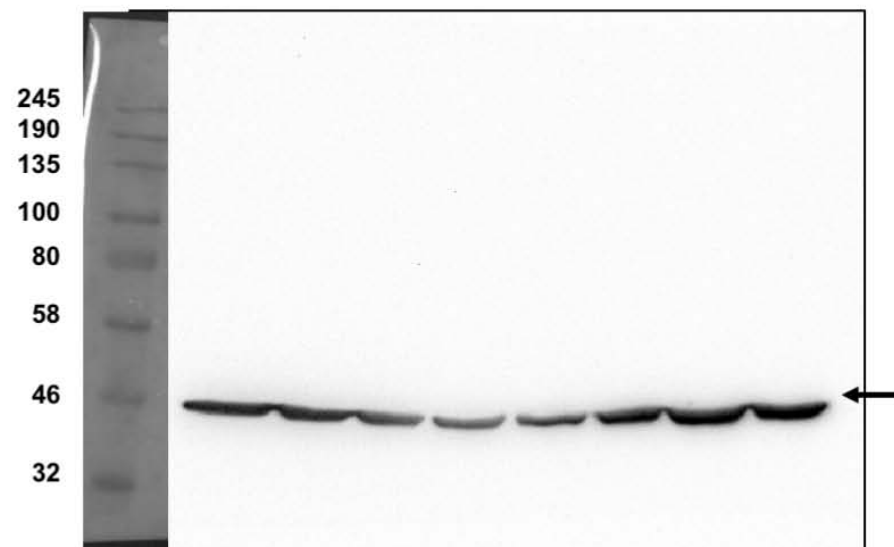

Experiment #1 ACTIN

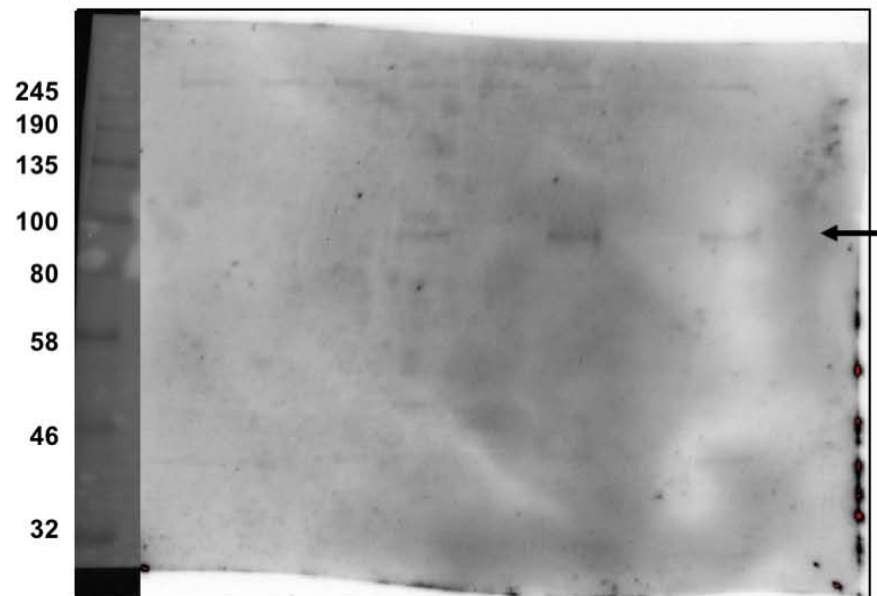

Experiment #2 FLAG-TLK2

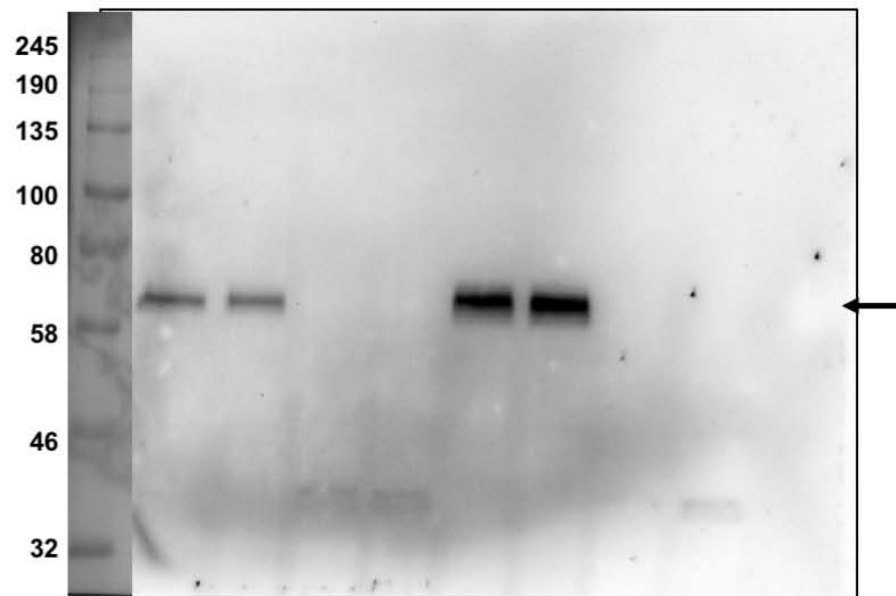

Experiment #2 CRY1

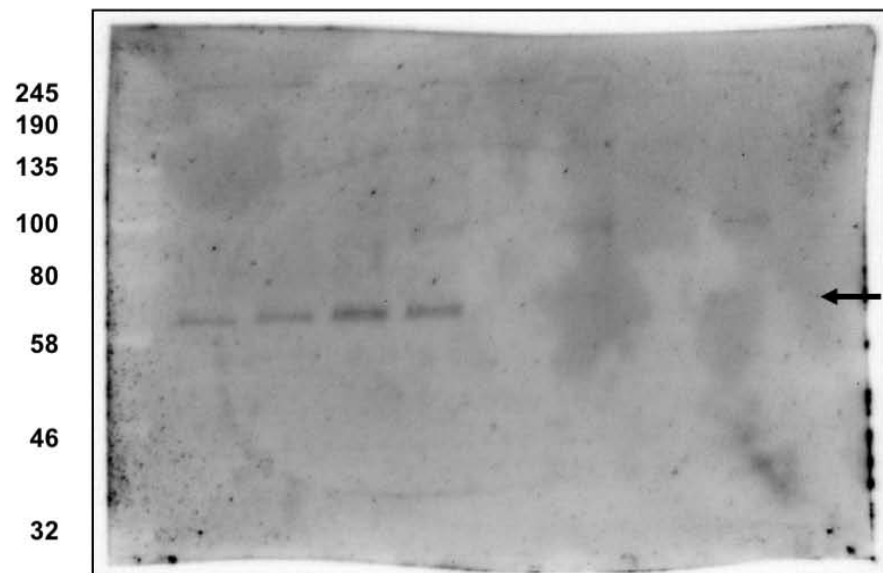

Experiment #2 CRY2

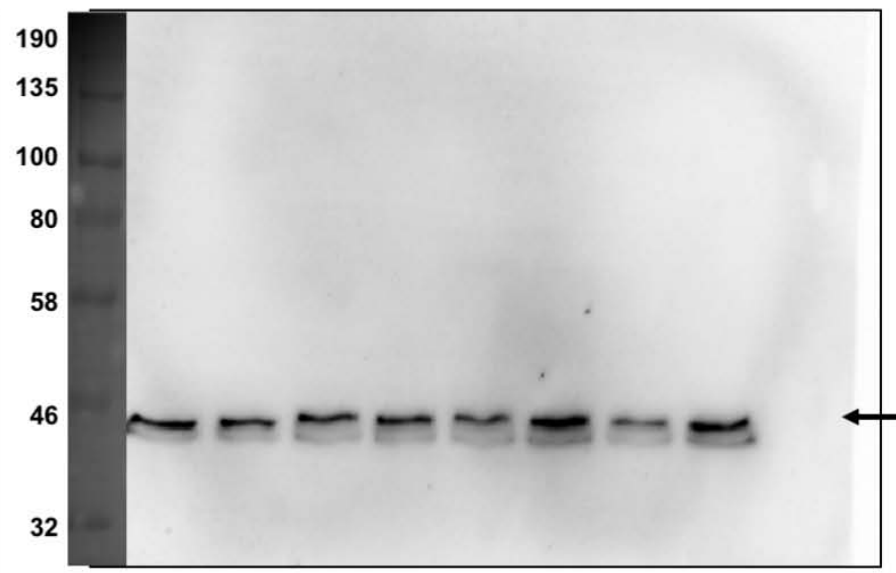

Experiment #2 ACTIN

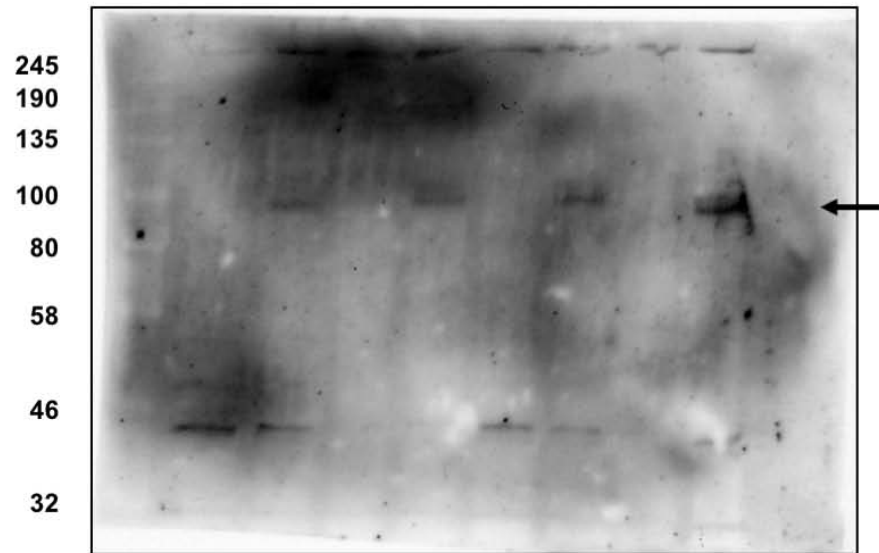

Experiment #3 FLAG-TLK2

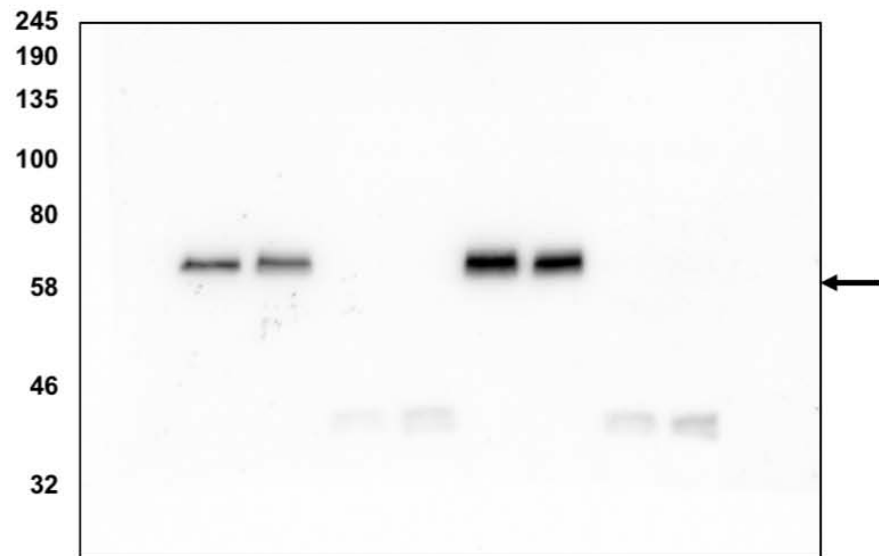

Experiment #3 CRY1

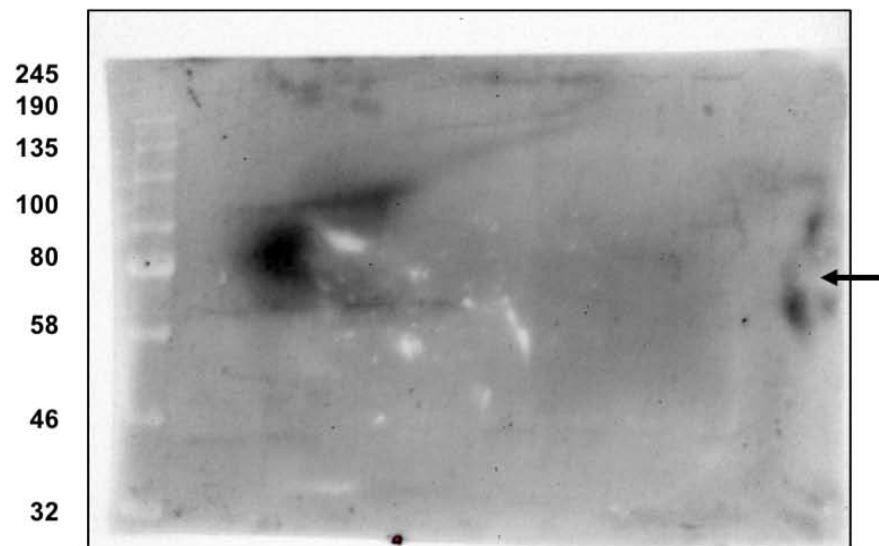

Experiment #3 CRY2

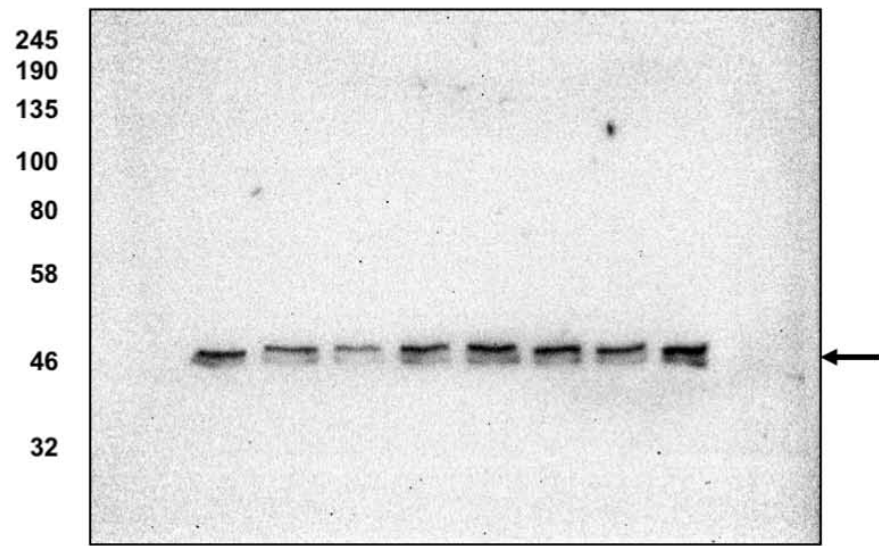

Experiment #3 ACTIN



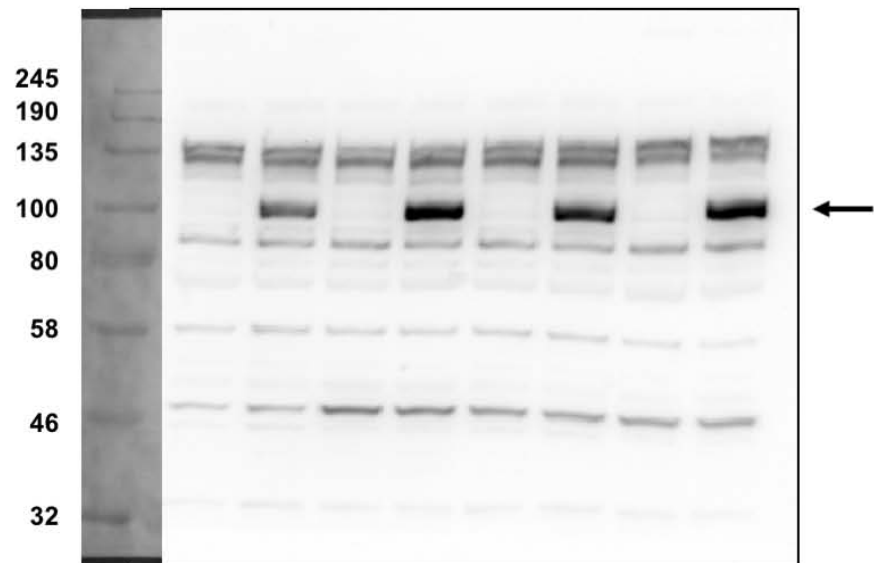

Experiment #1 FLAG-TLK2

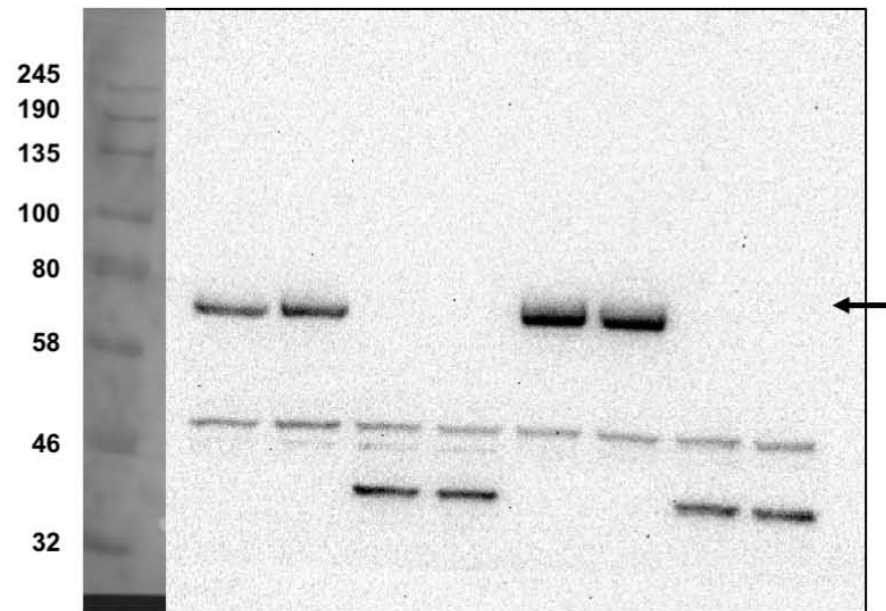

Experiment #1 CRY1

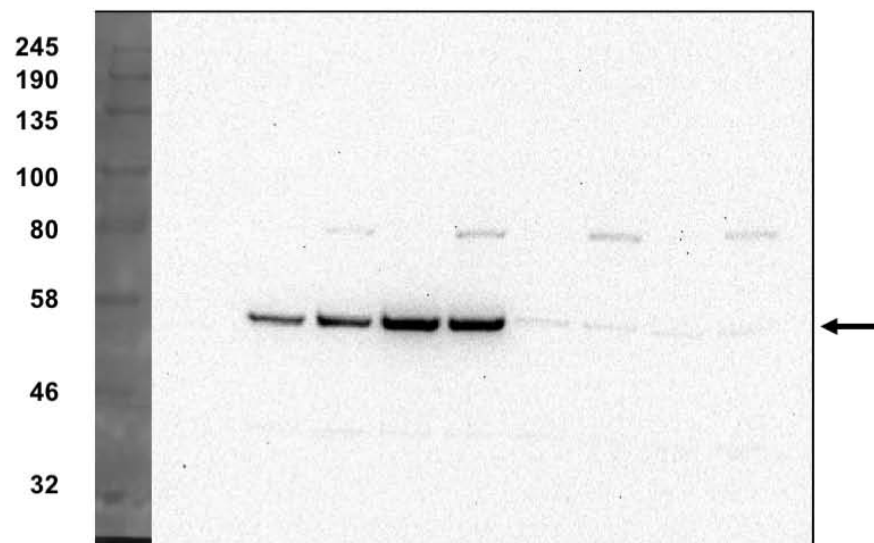

Experiment #1 CRY2

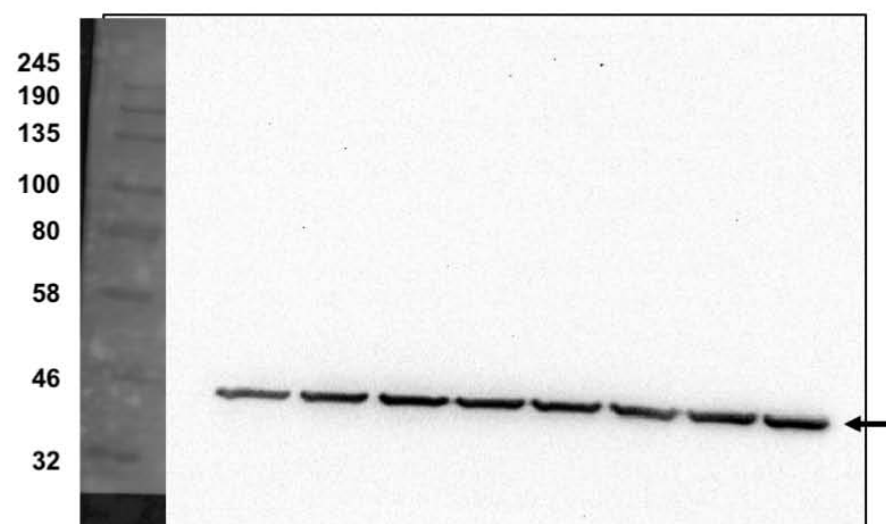

Experiment #1 ACTIN

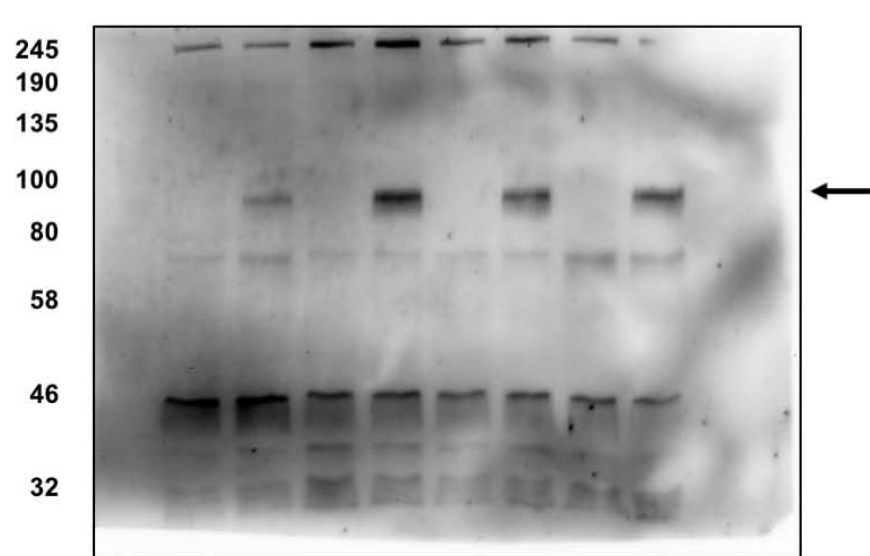

Experiment #2 FLAG-TLK2

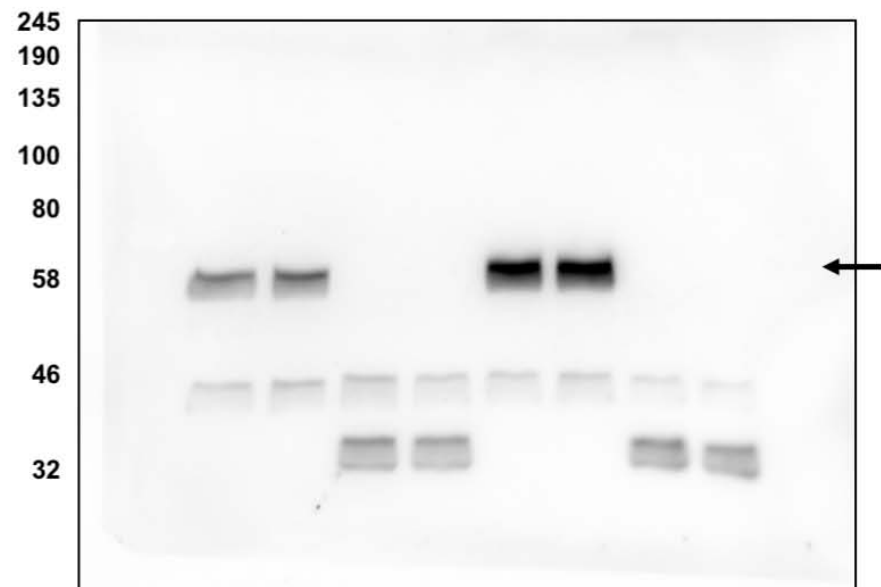

Experiment #2 CRY1

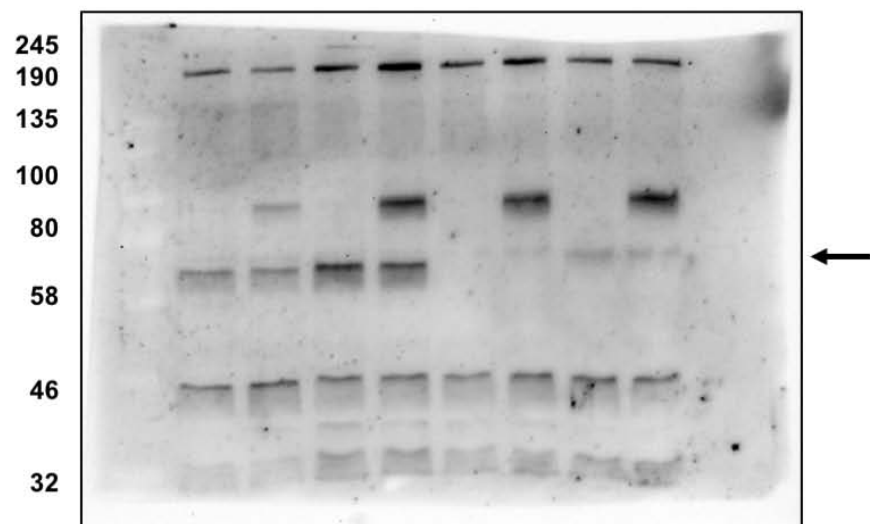

Experiment #2 CRY2

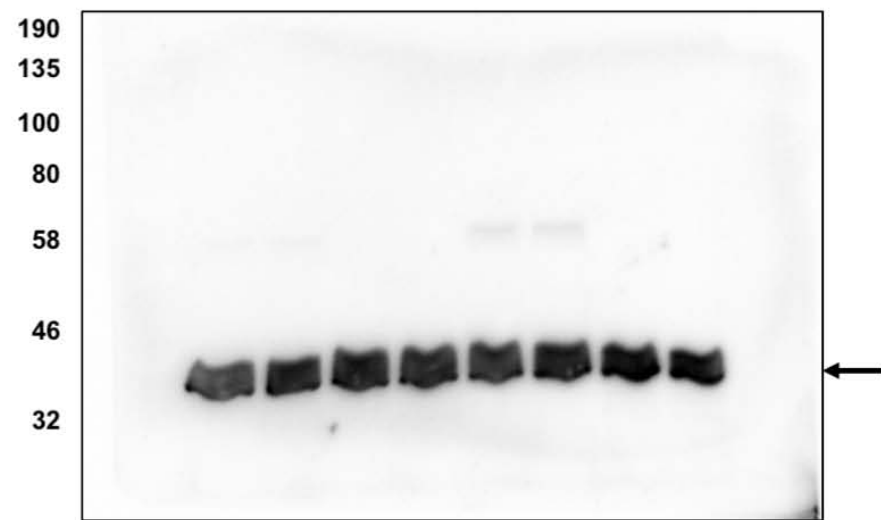

Experiment #2 ACTIN

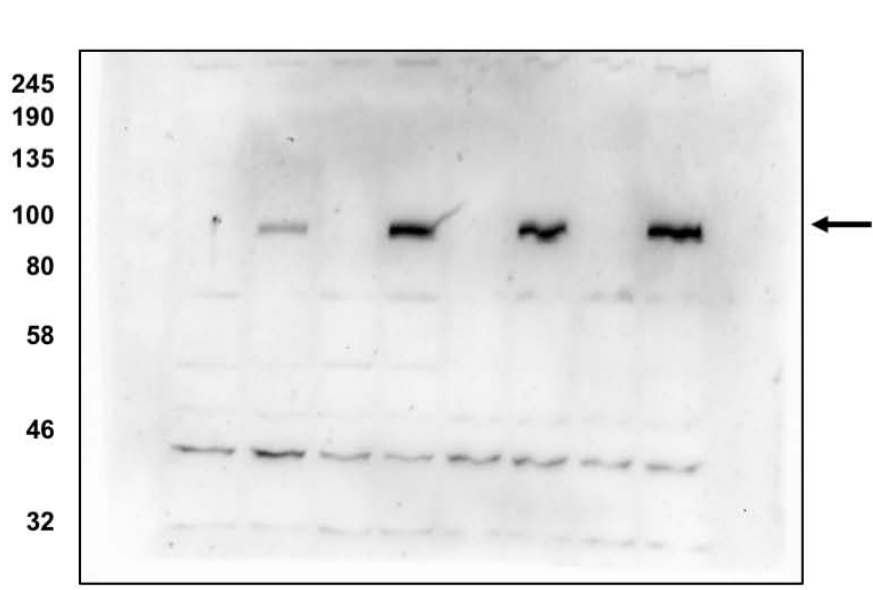

Experiment #3 FLAG-TLK2

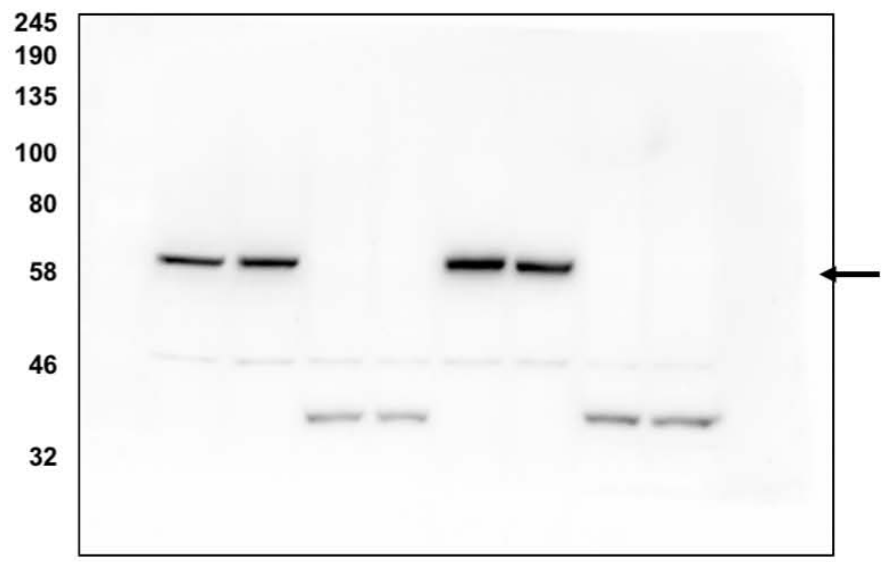

Experiment #3 CRY1

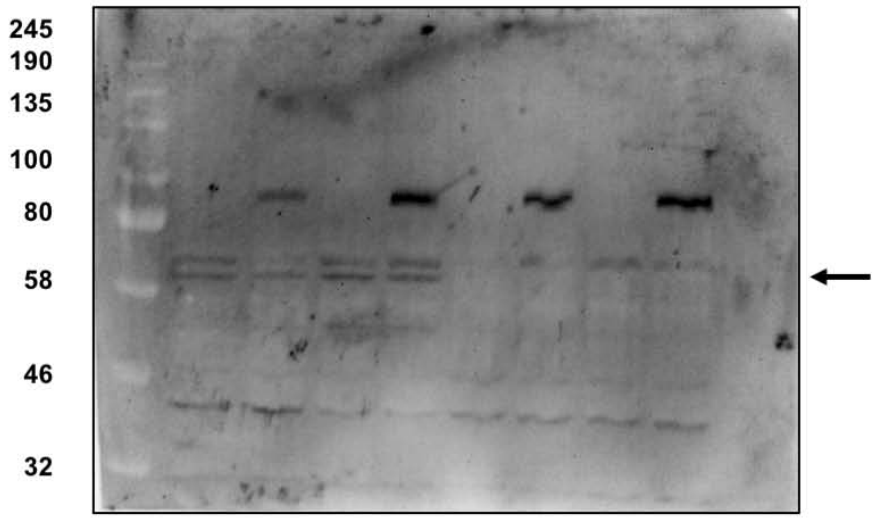

Experiment #3 CRY2

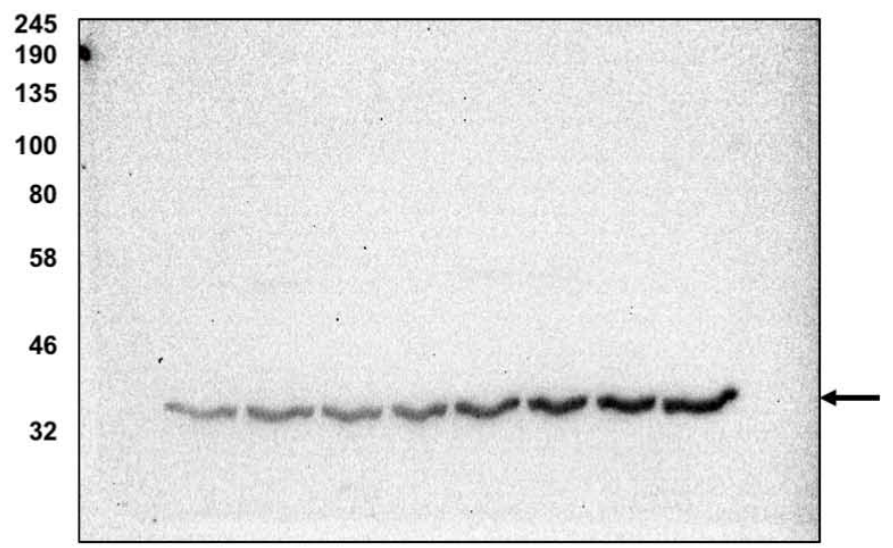

Experiment #3 ACTIN
